# Supplementary material for: High-yield synthesis of selenium nanowires in water at room temperature
Source: Royal Society of Chemistry journal article supplement (doi:10.1039/b515025f), 2006-01-01

## High-yield synthesis of selenium nanowires in water at room temperature

Qing Li and Vivian Wing-Wah Yam\*

Center for Carbon-Rich Molecular and Nano-Scale Metal-Based Materials Research and Department of  
Chemistry, The University of Hong Kong, Pokfulam Road, Hong Kong, P.R. China

\*Corresponding author. E-mail: [wwyam@hku.hk](mailto:wwyam@hku.hk)

### 1. Instrumentation

XRD was carried out by using a Philips PW1877 powder diffractometer with Cu K $\alpha$  radiation ( $\lambda = 1.54056 \text{ \AA}$ ). The Raman spectra were recorded using a 50.0 mW excitation line at 514.0 nm on a Renishaw Raman Spectrometer (system 2000), and the samples were prepared on glass substrates. SEM was performed on a LEO 1530 field-emission scanning electron microscope (FESEM), while TEM images were recorded on a Tecnai 20 (Philips) transmission electron microscope with an accelerating voltage of 200 kV.

### 2. EDX spectrum

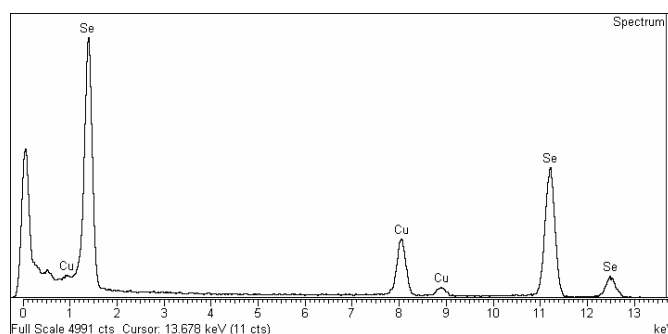

The corresponding EDX spectrum of t-Se nanowires deposited on a carbon-coated copper grid.

### 3. FESEM taken at various stages of the reaction

FESEM images showing a) the formation of spherical a-Se colloids immediately after mixing of the reagents; b) the clustering of a-Se into larger aggregates after 1 h; c) the formation of irregular wire-like a-Se after 4 h; d) small t-Se nanowires generated randomly on the surface of a-Se after aging in ethanol solution for 1 h; e) the as-prepared t-Se nanowires after aging in ethanol for 2 h.

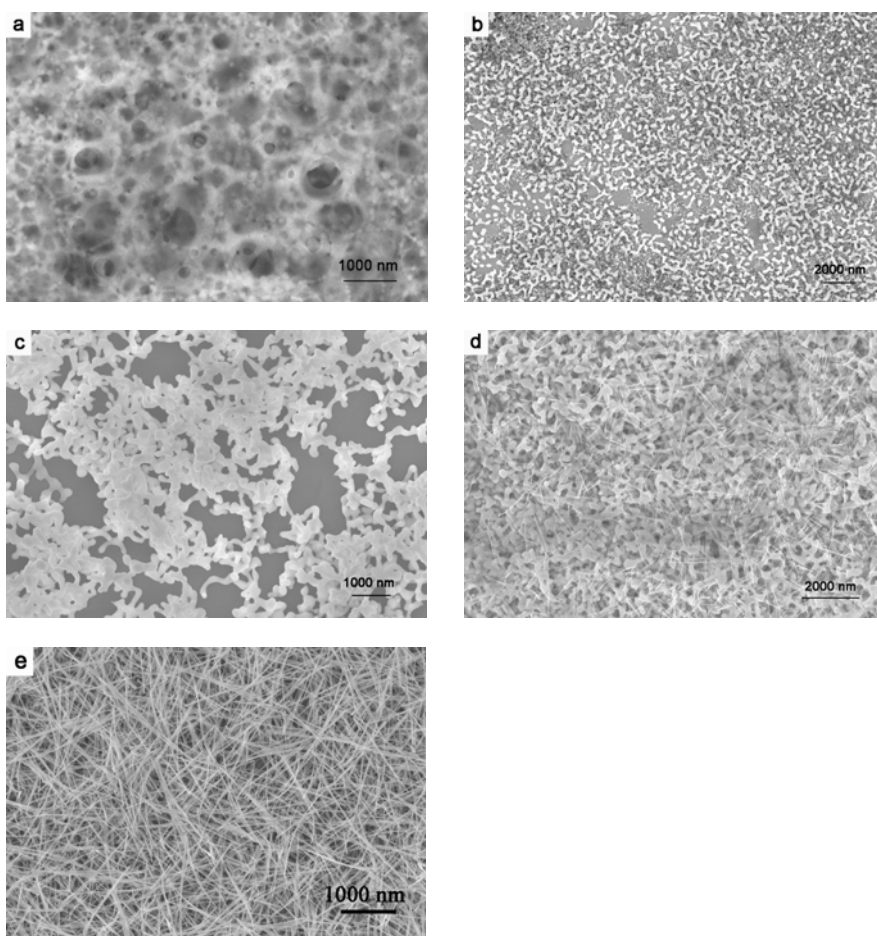

Supplement: b515025f.pdf [file b515025f.pdf]
